# Supplementary material for: A Photoresponsive Artificial Viral Capsid Self-Assembled from an Azobenzene-Containing β-Annulus Peptide
Source: MDPI journal article supplement (doi:10.3390/ijms22084028), 2021-04-14
Supplement: s1 [file s1]

## Supplementary Materials

### Photo-responsive Artificial Viral Capsid self-assembled from Azobenzene-containing $\beta$ -Annulus Peptide

Kazunori Matsuura <sup>1,2\*</sup>, Seiya Fujita <sup>1</sup>

<sup>1</sup> Department of Chemistry and Biotechnology, Graduate School of Engineering, Tottori University, Tottori 680-8552, Japan.

<sup>2</sup> Centre for Research on Green Sustainable Chemistry, Tottori University, Tottori 680-8552, Japan.

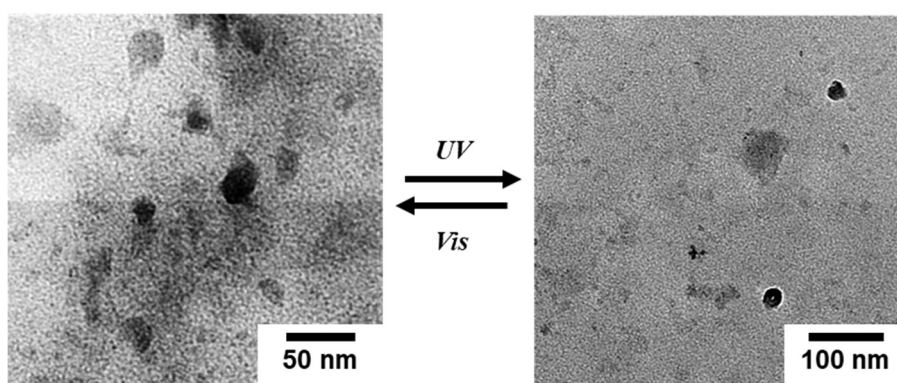

**Figure S1.** TEM images for aqueous solutions of  $\beta$ -annulus-azo peptide (100  $\mu$ M) after UV and visible light irradiation for 15 min at 25°C. The samples were stained with 2% phosphotungstic acid aq.

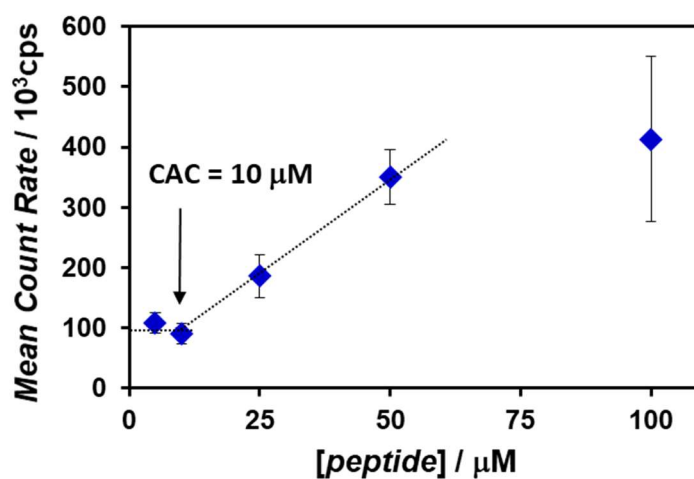

**Figure S2.** Effect of concentration of the  $\beta$ -annulus-azo peptide on scattering intensity determined by DLS at 25°C in water.

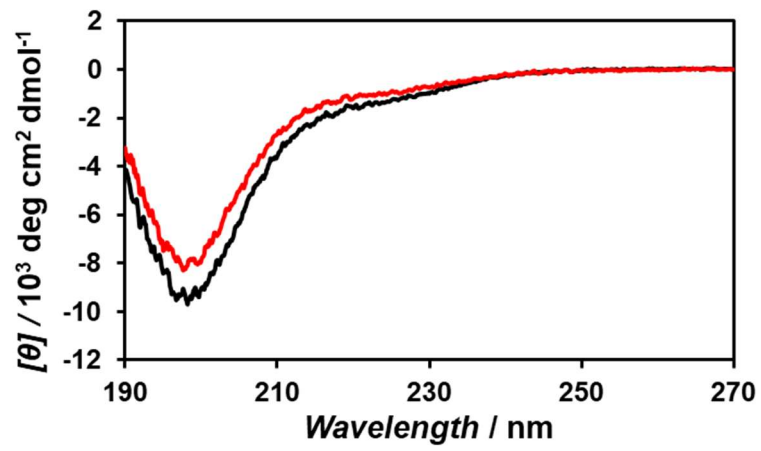

**Figure S3.** CD spectra of the aqueous solutions of the  $\beta$ -annulus-azo peptide before (red) and after (black) UV irradiation for 15 min at 25°C in water.

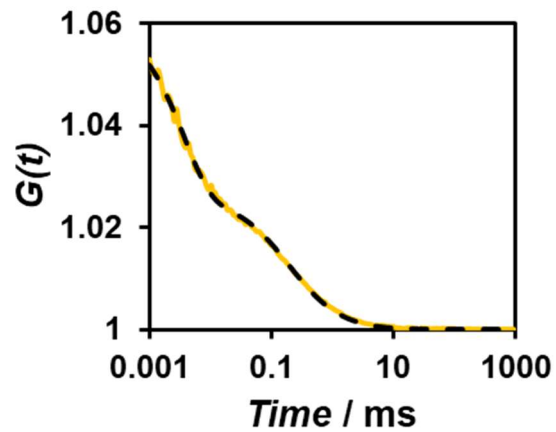

**Figure S4.** Measured (solid) and fitted (dot) autocorrelation curves for the 70-kDa FITC-labeled dextran (0.1  $\mu$ M) mixed with an aqueous solution of the  $\beta$ -annulus-azo peptide (50  $\mu$ M) at 25°C.

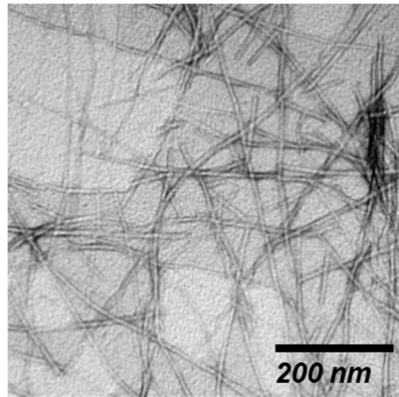

**Figure S5.** TEM images for aqueous solutions (100  $\mu\text{M}$ ) of  $\beta$ -annulus peptide in which Pro is replaced with Ala (INHVGTTGGAIMAAVAVTRQLVGS) at 25°C. The samples were stained with 2% phosphotungstic acid aq.
